# Supplementary material
Source: HighWire-hosted journal article supplement (https://erj.ersjournals.com/content/58/3/2003196)
Supplement: inline-supplementary-material-3 [file inline-supplementary-material-3.pdf]

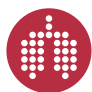

# Lung function and cardiovascular disease: a two-sample Mendelian randomisation study

SHAREABLE PDF

Daniel H. Higbee<sup>1,2</sup>, Raquel Granell<sup>1</sup>, Eleanor Sanderson<sup>1</sup>, George Davey Smith <sup>1</sup> and James W. Dodd <sup>1,2</sup>

<sup>1</sup>MRC Integrative Epidemiology Unit (IEU), University of Bristol, Bristol, UK. <sup>2</sup>Academic Respiratory Unit, University of Bristol, Southmead Hospital, Bristol, UK.

Corresponding author: James W. Dodd ([James.dodd@bristol.ac.uk](mailto:James.dodd@bristol.ac.uk))

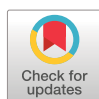

Shareable abstract (@ERSpublications)

**This two-sample multivariable Mendelian randomisation study provides strong evidence that FVC (but not FEV<sub>1</sub> or FEV<sub>1</sub>/FVC <0.7) is causally associated with coronary artery disease** <https://bit.ly/3t05kWJ>

**Cite this article as:** Higbee DH, Granell R, Sanderson E, *et al.* Lung function and cardiovascular disease: a two-sample Mendelian randomisation study. *Eur Respir J* 2021; 58: 2003196 [DOI: 10.1183/13993003.03196-2020].

This single-page version can be shared freely online.

Copyright ©The authors 2021. For reproduction rights and permissions contact [permissions@ersnet.org](mailto:permissions@ersnet.org)

This article has supplementary material available from [erj.ersjournals.com](http://erj.ersjournals.com)

Received: 18 Aug 2020  
Accepted: 21 Jan 2021

## Abstract

**Background** Observational studies suggest an association between reduced lung function and risk of coronary artery disease and ischaemic stroke, independent of shared cardiovascular risk factors such as cigarette smoking. We use the latest genetic epidemiological methods to determine whether impaired lung function is causally associated with an increased risk of cardiovascular disease.

**Methods and findings** Mendelian randomisation uses genetic variants as instrumental variables to investigate causation. Preliminary analysis used two-sample Mendelian randomisation with lung function single nucleotide polymorphisms. To avoid collider bias, the main analysis used single nucleotide polymorphisms for lung function identified from UKBiobank in a multivariable Mendelian randomisation model conditioning for height, body mass index and smoking.

Multivariable Mendelian randomisation shows strong evidence that reduced forced vital capacity (FVC) causes increased risk of coronary artery disease (OR 1.32, 95% CI 1.19–1.46 per standard deviation). Reduced forced expiratory volume in 1 s (FEV<sub>1</sub>) is unlikely to cause increased risk of coronary artery disease, as evidence of its effect becomes weak after conditioning for height (OR 1.08, 95% CI 0.89–1.30). There is weak evidence that reduced lung function increases risk of ischaemic stroke.

**Conclusion** There is strong evidence that reduced FVC is independently and causally associated with coronary artery disease. Although the mechanism remains unclear, FVC could be taken into consideration when assessing cardiovascular risk and considered a potential target for reducing cardiovascular events. FEV<sub>1</sub> and airflow obstruction do not appear to cause increased cardiovascular events; confounding and collider bias may explain previous findings of a causal association.
